# Supplementary material
Source: Research Square preprint supplement (doi:10.21203/rs.3.rs-9130280/v1)
Supplement: Supplementary file 1 [file 391796d04f73c5c58f50d6e2.docx]

**APPENDIX — SUPPLEMENTARY DATA TABLES**

Tables A1–A10 present the complete raw physicochemical data from which all figures in the main text were constructed.

**Table A1. Total Dissolved Solids (TDS, mg L⁻¹) — Adsorption method**

| **Time (h)** | **DW (mg L⁻¹)** | **IW (mg L⁻¹)** |
| --- | --- | --- |
| 0 h | 882 | 933 |
| 72 h | 933 | 1080 |
| 144 h | 3200 | 1297 |

**Table A2. Electrical Conductivity (EC, µS cm⁻¹) — Adsorption method**

| **Time (h)** | **DW (µS cm⁻¹)** | **IW (µS cm⁻¹)** |
| --- | --- | --- |
| 0 h | 1876 | 1985 |
| 72 h | 1985 | 2234 |
| 144 h | 6808 | 2759 |

**Table A3. Temperature (°C) — Adsorption method**

| **Time (h)** | **DW (°C)** | **IW (°C)** |
| --- | --- | --- |
| 0 h | 32.6 | 27.5 |
| 72 h | 31.9 | 32.2 |
| 144 h | 30.8 | 30.5 |

**Table A4. pH — Adsorption method**

| **Time (h)** | **DW pH** | **IW pH** |
| --- | --- | --- |
| 0 h | 5.99 | 4.70 |
| 72 h | 3.75 | 3.85 |
| 144 h | 3.49 | 3.47 |

**Table A5. Dissolved Oxygen (DO, mg L⁻¹) — Adsorption method**

| **Time (h)** | **DW (mg L⁻¹)** | **IW (mg L⁻¹)** |
| --- | --- | --- |
| 0 h | 5.57 | 8.25 |
| 72 h | 25.29 | 11.25 |
| 144 h | 35.43 | 14.85 |

**Table A6. BOD₅ (mg L⁻¹) — Adsorption method**

| **Time (h)** | **DW (mg L⁻¹)** | **IW (mg L⁻¹)** |
| --- | --- | --- |
| 0 h | 44.56 | 13.76 |
| 72 h | 34.59 | 9.43 |
| 144 h | 12.54 | 4.87 |

**Table A7. Total Suspended Solids (TSS, mg L⁻¹) — Adsorption method**

| **Time (h)** | **DW (mg L⁻¹)** | **IW (mg L⁻¹)** |
| --- | --- | --- |
| 0 h | 0.663 | 0.584 |
| 72 h | 0.925 | 1.245 |
| 144 h | 2.607 | 2.409 |

**Table A8. Total Solids (TS, mg L⁻¹) — Adsorption method**

| **Time (h)** | **DW (mg L⁻¹)** | **IW (mg L⁻¹)** |
| --- | --- | --- |
| 0 h | 0.123 | 3.666 |
| 72 h | 2.201 | 5.546 |
| 144 h | 3.234 | 7.231 |

**Table A9. All physicochemical parameters — Filtration (before vs. after)**

| **Parameter** | **DW Before** | **DW After** | **IW Before** | **IW After** |
| --- | --- | --- | --- | --- |
| TDS (mg L⁻¹) | 882 | 953 | 933 | 1035 |
| EC (µS cm⁻¹) | 1876 | 6305 | 1985 | 2845 |
| Temperature (°C) | 32.6 | 30.5 | 27.5 | 31.2 |
| pH | 5.99 | 3.50 | 4.70 | 3.33 |
| DO (mg L⁻¹) | 5.57 | 2.65 | 8.25 | 5.34 |
| BOD₅ (mg L⁻¹) | 44.56 | 15.73 | 13.76 | 6.32 |
| TSS (mg L⁻¹) | 0.663 | 4.320 | 0.584 | 3.430 |
| TS (mg L⁻¹) | 0.123 | 1.429 | 3.666 | 5.572 |

**Table A10. Cyanide concentration [CN⁻] in industrial wastewater — both methods**

| **Sampling Point** | **Method** | **[CN⁻] (mg L⁻¹)** | **Removal (%)** |
| --- | --- | --- | --- |
| Before treatment | — | 26.5 | — |
| After filtration | Filtration | 15.6 | 41.1 |
| 72 h | Adsorption | 24.8 | 6.4 |
| 144 h | Adsorption | 23.0 | 13.2 |
